# Supplementary material for: Software for the Diagnosis of Sarcopenia in Community-Dwelling Older Adults: Design and Validation Study
Source: PubMed Central journal article supplement (PMC7186874; doi:10.2196/13657), 2020-04-13

Figure 3. Screenshots from HTSmayor app

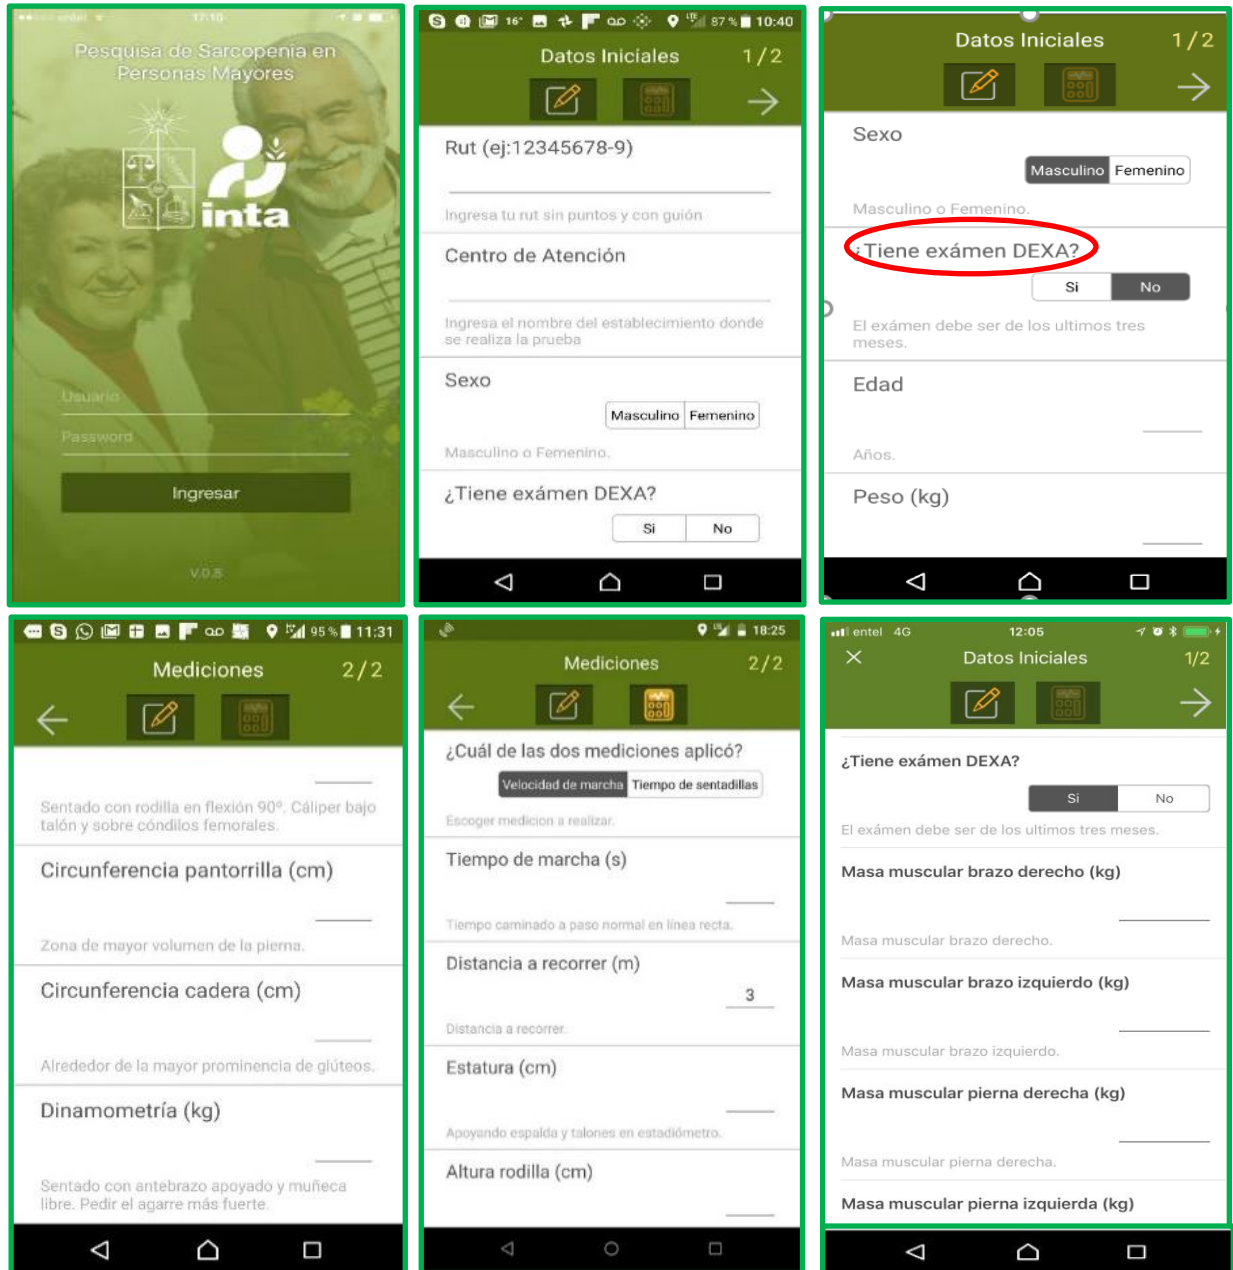

Figure 4. Screenshots from HTSmayor (Web version)

**inta** UNIVERSIDAD DE CHILE  
Instituto de Nutrición y Tecnología de los Alimentos  
Doctor Fernando Monckeberg Barros

# HTSmayor

Control de acceso

NOMBRE DE USUARIO  
llera

CONTRASEÑA  
\*\*\*\*\*

INGRESAR

[Recuperar Contraseña](#)

CONICYT  
Sistema de Chile

**FONDEF**  
Fondo de Fomento al Desarrollo Científico y Tecnológico

Figure 5. Results of the HTSmayor (mobile app and Web versions)

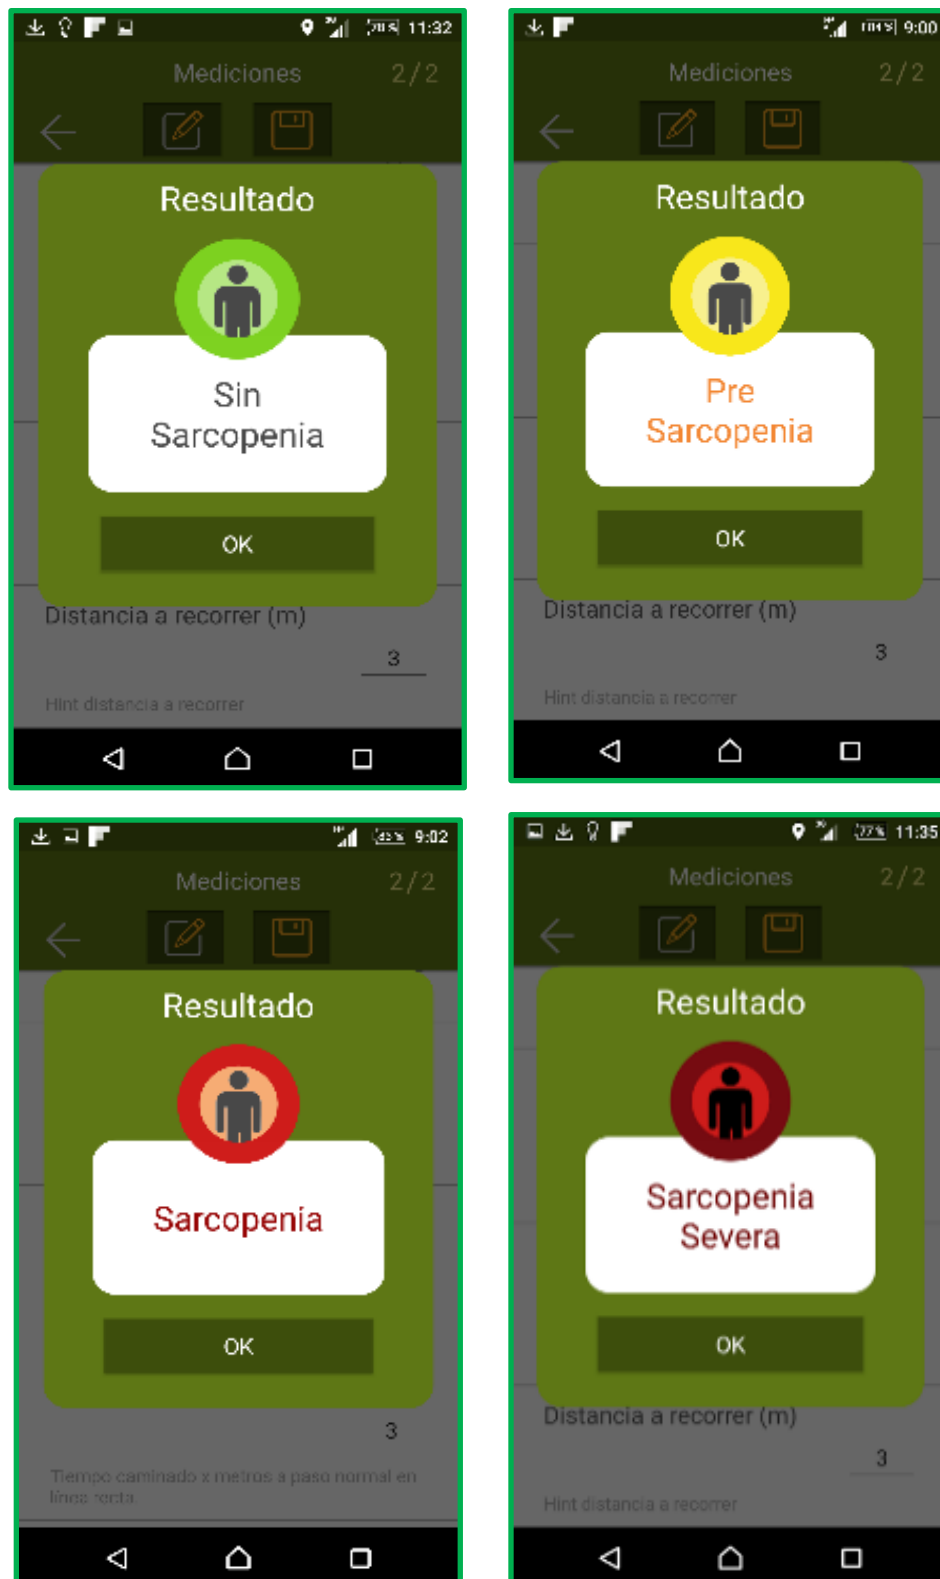

Supplement: medinform_v8i4e13657_app2.pdf [file medinform_v8i4e13657_app2.pdf]
